# Supplementary figures and images for: Microglial pattern recognition via IL-33 promotes synaptic refinement in developing corticothalamic circuits in mice
Source: PubMed Central journal article supplement — J Exp Med. 2022 Dec 15;220(2):e20220605. doi: 10.1084/jem.20220605 (PMC9757845; doi:10.1084/jem.20220605), 2022-12-15

Uncropped original blots

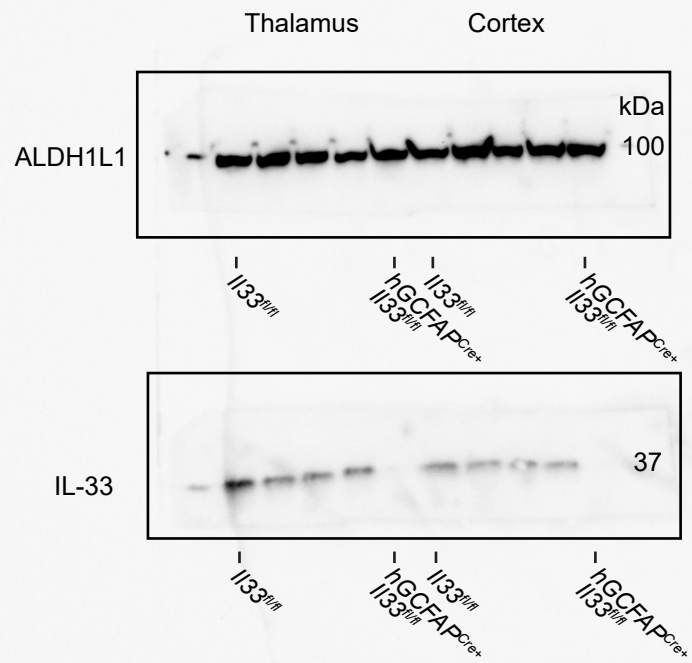

Adopted from Supplementary Figure S4

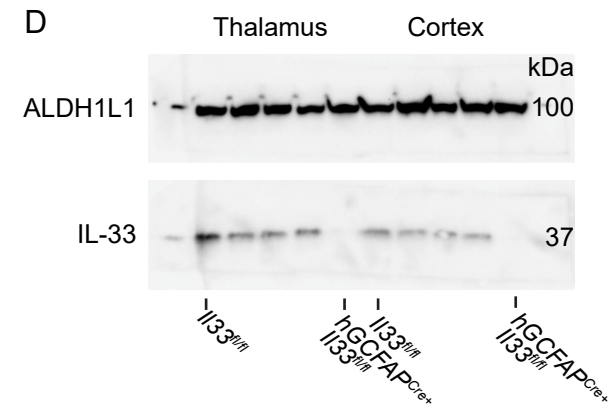

Supplement: JEM_20220605_SourceDataFS4.pdf [file JEM_20220605_SourceDataFS4.pdf]
